# Supplementary material for: Selection and validation of reference genes for gene expression studies in Klebsiella pneumoniae using Reverse Transcription Quantitative real-time PCR
Source: PubMed Central journal article supplement (PMC5998039; doi:10.1038/s41598-018-27420-2), 2018-06-13
Supplement: 41598_2018_27420_MOESM1_ESM.pdf [file 41598_2018_27420_MOESM1_ESM.pdf]

## SUPPLEMENTARY INFORMATION

### **Selection and validation of reference genes for gene expression studies in *Klebsiella pneumoniae* using Reverse Transcription Quantitative real-time PCR**

Ana Érika Inácio Gomes<sup>1</sup>, Leonardo Prado Stuchi<sup>1</sup>, Nathália Maria Gonçalves Siqueira<sup>1</sup>, João Batista Henrique<sup>1</sup>, Renato Vicentini<sup>2</sup>, Marcelo Lima Ribeiro<sup>3</sup>, Michelle Darrieux<sup>1</sup>, Lúcio Fábio Caldas Ferraz<sup>1,\*</sup>

<sup>1</sup>Laboratório de Biologia Molecular de Microrganismos, Universidade São Francisco, Bragança Paulista, SP, 12916-900, Brasil

<sup>2</sup>Centro de Biologia Molecular e Engenharia Genética, Universidade Estadual de Campinas, Campinas, SP, 13083-875, Brasil

<sup>3</sup>Unidade Integrada de Farmacologia e Gastroenterologia (UNIFAG), Universidade São Francisco, Bragança Paulista, SP, 12916-900, Brasil

\*Corresponding author: [lucio.ferraz@usf.edu.br](mailto:lucio.ferraz@usf.edu.br)

## SUPPLEMENTARY FIGURE

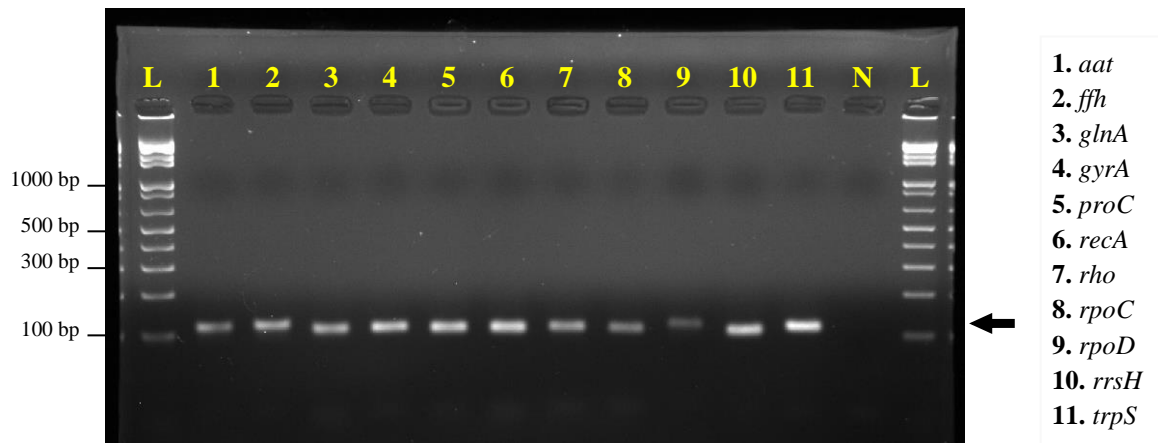

**FIGURE S1.** Agarose gel (1.5%) electrophoresis showing single PCR products of expected size (arrow), thus confirming the specificity of the pairs of primers for each gene. **L**, 1 Kb Plus DNA ladder (Thermo Fisher Scientific). **N**, negative control (PCR reaction without template DNA and with pair of primers for *trpS* gene).

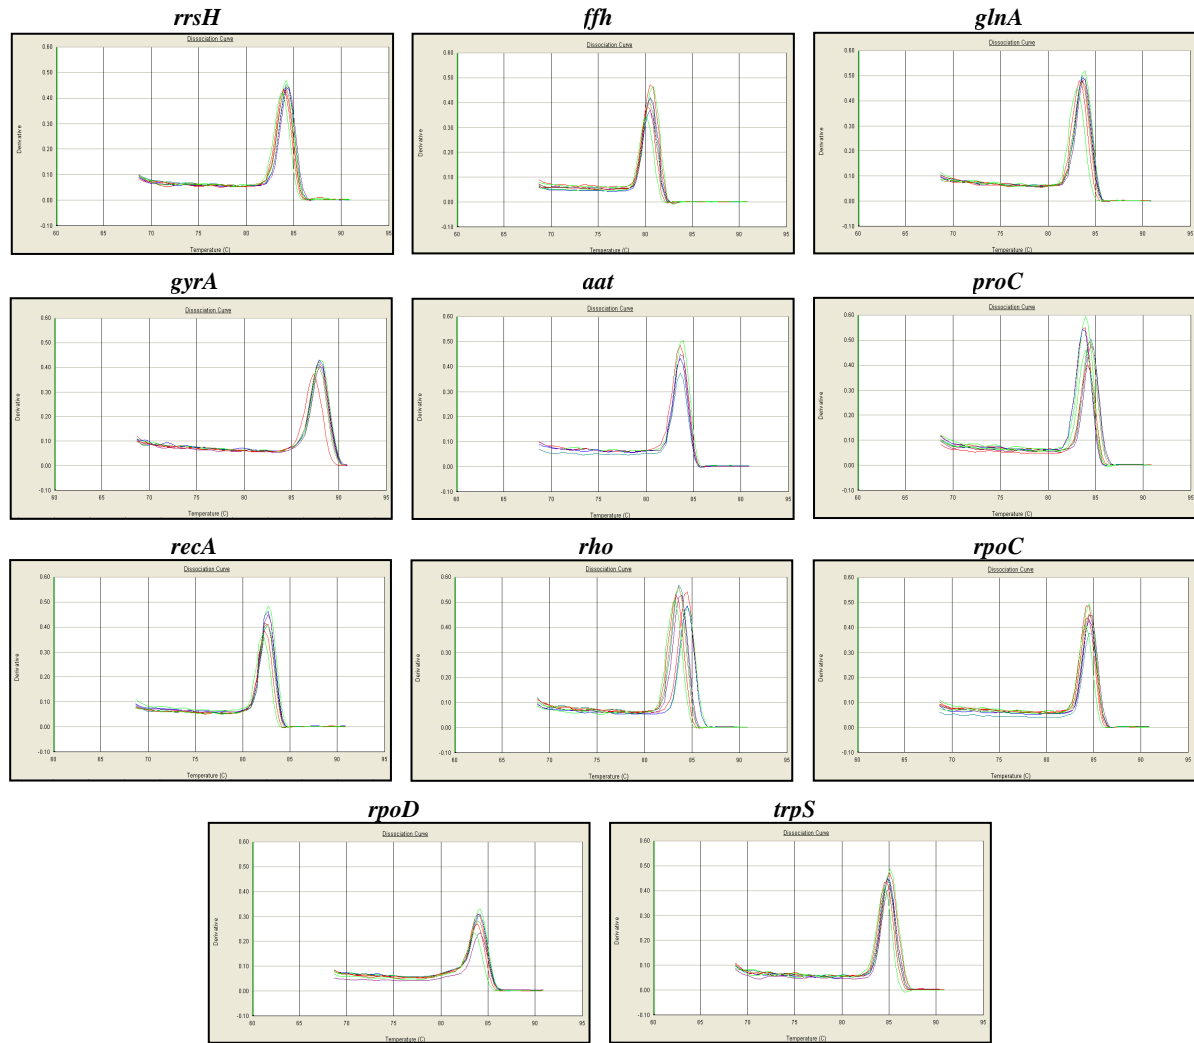

**FIGURE S2.** Dissociation-curve analyses showing only single peaks and the absence of primer-dimers formation and nonspecific amplification.

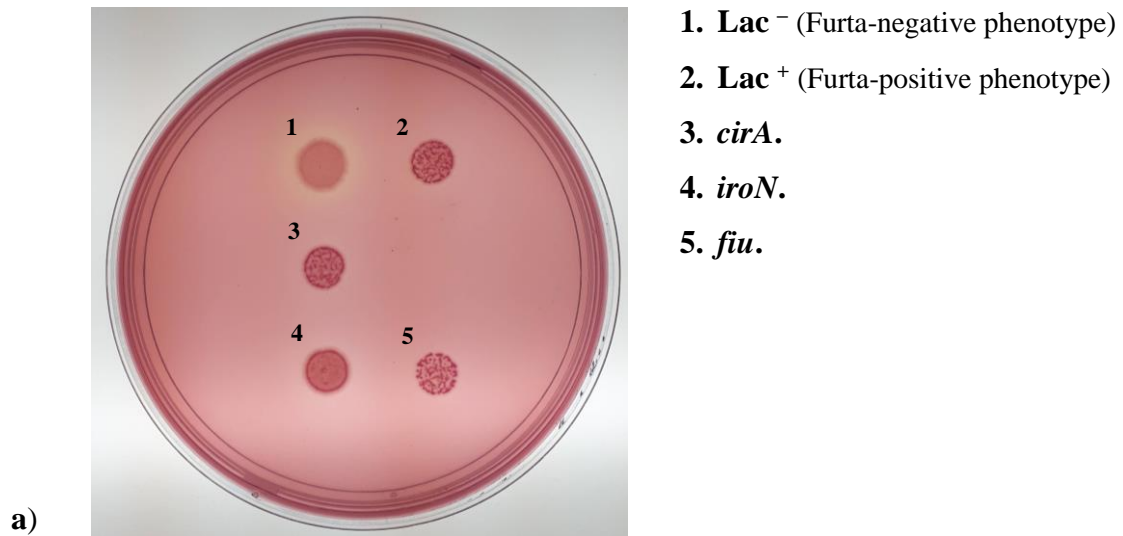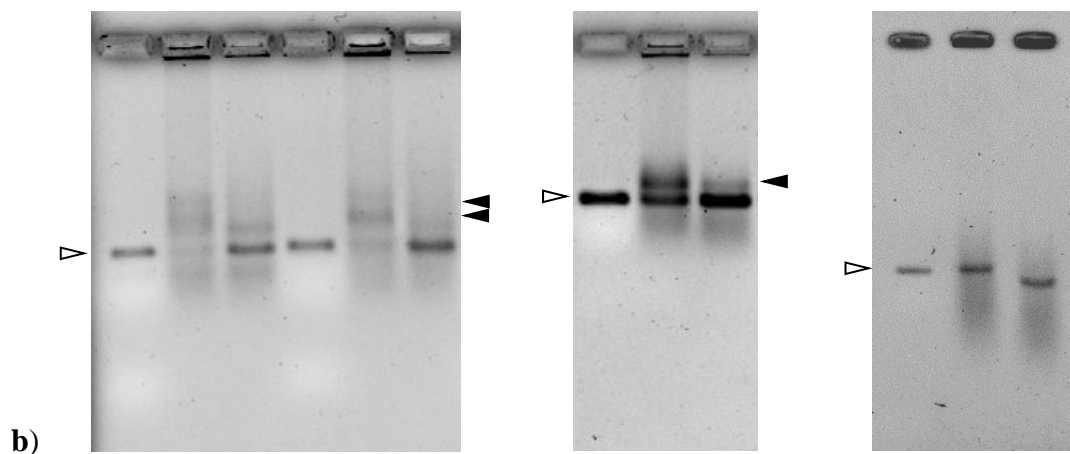

**FIGURE S3.** Full-length figures showing the validation of the putative Fur boxes identified on the upstream region of the genes *cirA*, *iroN* and *fiu* by FURTA (a) and EMSA (b). In a) **FURTA:** **Lac**<sup>+</sup> indicates FURTA-positive phenotype, whereas **Lac**<sup>-</sup> indicates FURTA-negative phenotype. All putative Fur boxes resulted on red *E. coli* H1717 colonies on MacConkey plates, which were interpreted as FURTA positive results. b) **EMSA:** Lanes 1, 2 and 3 contained 50 ng of the respective DNA probes. The DNA probes were incubated with 500 ng of His-Fur protein either in the presence of divalent cation (Lanes 2) or under divalent cation-free conditions by adding 2 mM EDTA (Lanes 3). Open arrowheads indicate the free DNA probes, while closed arrowheads indicate the mobility shift corresponding to the Fur/DNA complexes.

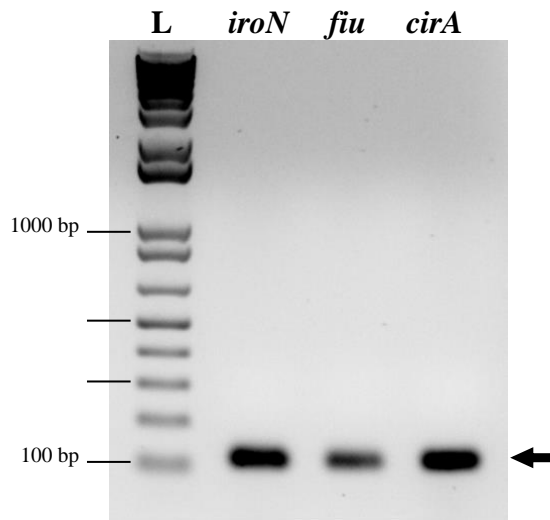

**FIGURE S4.** Agarose gel (1.5%) electrophoresis showing single PCR products of expected size (arrow) for *ironN*, *fiu* and *cirA* genes from *K. pneumoniae* strain ATCC 10031. **L**, 1 Kb Plus DNA ladder (Thermo Fisher Scientific).

## SUPPLEMENTARY TABLES

**TABLE S1.** Functional category, locus number, product name and function of each selected reference gene candidates.

| <b>Functional categories</b> | <b>Gene/Locus</b>          | <b>Product Name<sup>1</sup></b>              | <b>Function<sup>2</sup></b>                                                                                                                                                                                    |
|------------------------------|----------------------------|----------------------------------------------|----------------------------------------------------------------------------------------------------------------------------------------------------------------------------------------------------------------|
| Cell metabolism              | <i>proC</i><br>(KPN_00329) | Pyrroline-5-carboxylate reductase            | Catalyzes the formation of L-proline from pyrroline-5-carboxylate.                                                                                                                                             |
|                              | <i>glnA</i><br>(KPN_04178) | Glutamine synthetase                         | Glutamine synthesis from ammonia and glutamate; also functions in the assimilation of ammonia.                                                                                                                 |
| DNA replication              | <i>gyrA</i><br>(KPN_02640) | DNA gyrase subunit A                         | ATP-dependent breakage, passage and rejoining of double-stranded DNA.                                                                                                                                          |
|                              | <i>recA</i><br>(KPN_03031) | Recombinase A                                | Catalyzes the hydrolysis of ATP in the presence of single-stranded DNA, the ATP-dependent uptake of single-stranded DNA by duplex DNA, and the ATP-dependent hybridization of homologous single-stranded DNAs. |
| DNA transcription            | <i>rpoD</i><br>(KPN_03474) | RNA polymerase sigma factor RpoD             | Sigma factors promote the attachment of RNA polymerase to specific initiation sites. RpoD is the primary sigma factor of bacteria.                                                                             |
|                              | <i>rho</i><br>(KPN_04283)  | Transcription termination factor Rho         | An RNA-DNA helicase that actively releases nascent mRNAs from paused transcription complexes.                                                                                                                  |
|                              | <i>rpoC</i><br>(KPN_04366) | DNA-directed RNA polymerase subunit beta'    | RNA polymerase subunit beta' binds to sigma factor allowing it to bind to the -10 region of the promoter.                                                                                                      |
| Protein synthesis            | <i>rrsH</i><br>(KPN_00215) | 16S ribosomal RNA subunit                    | Component of the small subunit (30S) of the ribosomes.                                                                                                                                                         |
|                              | <i>aat</i><br>(KPN_00917)  | Leucyl/phenylalanyl tRNA protein transferase | It works in the N-end rule pathway; transfers Leu, Phe, Met, from aminoacyl-tRNAs to proteins containing an N-terminal arginine, lysine or histidine.                                                          |
|                              | <i>ffh</i><br>(KPN_02933)  | Signal recognition particle protein          | Forms a signal recognition particle with 4.5S RNA involved in targeting and integration of inner membrane proteins.                                                                                            |
|                              | <i>trpS</i><br>(KPN_04752) | Tryptophanyl-tRNA synthetase II              | Catalyzes a two-step reaction, first charging a tryptophan molecule by linking its carboxyl group to the alpha-phosphate of ATP, followed by transfer of the aminoacyl-adenylate to its tRNA.                  |

1) Product name according to the annotated genome sequence of *Klebsiella pneumoniae* MGH 78578 (GenBank accession number CP000647.1). 2) Function according to NCBI Reference Sequence NC\_009648.1 and Gene Ontology.

**Table S2.** Percentage sequence identity of *aat* gene among strains of *K. pneumoniae* from phylogroups KpI, KpII and KpIII.

| <i>aat</i> gene | KpI  |                  |                   |                  |                   |                  |                   |                  |                   | KpII             |                  | KpIII            |
|-----------------|------|------------------|-------------------|------------------|-------------------|------------------|-------------------|------------------|-------------------|------------------|------------------|------------------|
| Strain          | 1084 | ATCC 10031       | CG43              | HS11286          | JM45              | KCTC 2242        | Kp13              | MGH 78578        | NTUH-K2044        | ATCC 700603      | HKUOPA4          | 342              |
| 1084            | –    | 99%<br>(698/702) | 99%<br>(698/702)  | 99%<br>(696/697) | 99%<br>(701/702)  | 99%<br>(699/702) | 99%<br>(701/702)  | 99%<br>(698/702) | 100%<br>(702/702) | 95%<br>(666/699) | 95%<br>(666/699) | 91%<br>(634/697) |
| ATCC 10031      |      | –                | 100%<br>(702/702) | 99%<br>(694/697) | 99%<br>(699/702)  | 99%<br>(701/702) | 99%<br>(699/702)  | 99%<br>(700/702) | 99%<br>(698/702)  | 95%<br>(662/699) | 95%<br>(662/699) | 91%<br>(634/697) |
| CG43            |      |                  | –                 | 99%<br>(694/697) | 99%<br>(699/702)  | 99%<br>(701/702) | 99%<br>(699/702)  | 99%<br>(700/702) | 99%<br>(698/702)  | 95%<br>(662/699) | 95%<br>(662/699) | 91%<br>(634/697) |
| HS11286         |      |                  |                   | –                | 100%<br>(697/697) | 99%<br>(695/697) | 100%<br>(697/697) | 99%<br>(694/697) | 99%<br>(696/697)  | 95%<br>(663/697) | 95%<br>(663/697) | 91%<br>(633/697) |
| JM45            |      |                  |                   |                  | –                 | 99%<br>(700/702) | 100%<br>(702/702) | 99%<br>(699/702) | 99%<br>(701/702)  | 95%<br>(665/699) | 95%<br>(665/699) | 91%<br>(633/697) |
| KCTC 2242       |      |                  |                   |                  |                   | –                | 99%<br>(700/702)  | 99%<br>(701/702) | 99%<br>(699/702)  | 95%<br>(663/699) | 95%<br>(663/699) | 91%<br>(635/697) |
| Kp13            |      |                  |                   |                  |                   |                  | –                 | 99%<br>(699/702) | 99%<br>(701/702)  | 95%<br>(665/699) | 95%<br>(665/699) | 91%<br>(633/697) |
| MGH 78578       |      |                  |                   |                  |                   |                  |                   | –                | 99%<br>(698/702)  | 95%<br>(662/699) | 95%<br>(662/699) | 91%<br>(634/697) |
| NTUH-K2044      |      |                  |                   |                  |                   |                  |                   |                  | –                 | 95%<br>(666/699) | 95%<br>(665/699) | 91%<br>(634/697) |
| ATCC 700603     |      |                  |                   |                  |                   |                  |                   |                  |                   | –                | 99%<br>(696/705) | 93%<br>(653/705) |
| HKUOPA4         |      |                  |                   |                  |                   |                  |                   |                  |                   |                  | –                | 92%<br>(652/705) |
| 342             |      |                  |                   |                  |                   |                  |                   |                  |                   |                  |                  | –                |

**Table S3.** Percentage sequence identity of *ffh* gene among strains of *K. pneumoniae* from phylogroups KpI, KpII and KpIII.

| <i>ffh</i> gene | KpI  |                    |                    |                    |                     |                    |                    |                    |                     | KpII               |                    | KpIII              |
|-----------------|------|--------------------|--------------------|--------------------|---------------------|--------------------|--------------------|--------------------|---------------------|--------------------|--------------------|--------------------|
| Strain          | 1084 | ATCC 10031         | CG43               | HS11286            | JM45                | KCTC 2242          | Kp13               | MGH 78578          | NTUH-K2044          | ATCC 700603        | HKUOPA4            | 342                |
| 1084            | –    | 99%<br>(1353/1365) | 99%<br>(1354/1365) | 99%<br>(1357/1365) | 99%<br>(1357/1365)  | 99%<br>(1354/1365) | 99%<br>(1358/1365) | 99%<br>(1356/1365) | 100%<br>(1365/1365) | 97%<br>(1323/1365) | 97%<br>(1322/1365) | 98%<br>(1332/1365) |
| ATCC 10031      |      | –                  | 99%<br>(1364/1365) | 99%<br>(1355/1365) | 99%<br>(1355/1365)  | 99%<br>(1352/1365) | 99%<br>(1356/1365) | 99%<br>(1358/1365) | 99%<br>(1353/1365)  | 97%<br>(1323/1365) | 97%<br>(1322/1365) | 98%<br>(1334/1365) |
| CG43            |      |                    | –                  | 99%<br>(1356/1365) | 99%<br>(1356/1365)  | 99%<br>(1353/1365) | 99%<br>(1357/1365) | 99%<br>(1359/1365) | 99%<br>(1354/1365)  | 97%<br>(1324/1365) | 97%<br>(1323/1365) | 98%<br>(1335/1365) |
| HS11286         |      |                    |                    | –                  | 100%<br>(1365/1365) | 99%<br>(1354/1365) | 99%<br>(1362/1365) | 99%<br>(1360/1365) | 99%<br>(1357/1365)  | 97%<br>(1323/1365) | 97%<br>(1322/1365) | 98%<br>(1332/1365) |
| JM45            |      |                    |                    |                    | –                   | 99%<br>(1354/1365) | 99%<br>(1362/1365) | 99%<br>(1360/1365) | 99%<br>(1357/1365)  | 97%<br>(1323/1365) | 97%<br>(1322/1365) | 98%<br>(1332/1365) |
| KCTC 2242       |      |                    |                    |                    |                     | –                  | 99%<br>(1355/1365) | 99%<br>(1355/1365) | 99%<br>(1354/1365)  | 97%<br>(1322/1365) | 97%<br>(1319/1365) | 98%<br>(1333/1365) |
| Kp13            |      |                    |                    |                    |                     |                    | –                  | 99%<br>(1363/1365) | 99%<br>(1358/1365)  | 97%<br>(1324/1365) | 97%<br>(1323/1365) | 98%<br>(1333/1365) |
| MGH 78578       |      |                    |                    |                    |                     |                    |                    | –                  | 99%<br>(1356/1365)  | 97%<br>(1322/1365) | 97%<br>(1321/1365) | 98%<br>(1333/1365) |
| NTUH-K2044      |      |                    |                    |                    |                     |                    |                    |                    | –                   | 97%<br>(1323/1365) | 97%<br>(1322/1365) | 98%<br>(1332/1365) |
| ATCC 700603     |      |                    |                    |                    |                     |                    |                    |                    |                     | –                  | 99%<br>(1358/1365) | 97%<br>(1319/1365) |
| HKUOPA4         |      |                    |                    |                    |                     |                    |                    |                    |                     |                    | –                  | 96%<br>(1316/1365) |
| 342             |      |                    |                    |                    |                     |                    |                    |                    |                     |                    |                    | –                  |



**Table S4.** Percentage sequence identity of *glnA* gene among strains of *K. pneumoniae* from phylogroups KpI, KpII and KpIII.

| <i>glnA</i> gene | KpI  |                    |                     |                     |                     |                    |                    |                     |                     | KpII               |                    | KpIII              |
|------------------|------|--------------------|---------------------|---------------------|---------------------|--------------------|--------------------|---------------------|---------------------|--------------------|--------------------|--------------------|
| Strain           | 1084 | ATCC 10031         | CG43                | HS11286             | JM45                | KCTC 2242          | Kp13               | MGH 78578           | NTUH-K2044          | ATCC 700603        | HKUOPA4            | 342                |
| 1084             | –    | 99%<br>(1384/1386) | 99%<br>(1408/1410)  | 100%<br>(1410/1410) | 100%<br>(1386/1386) | 99%<br>(1385/1386) | 99%<br>(1385/1386) | 99%<br>(1385/1386)  | 100%<br>(1386/1386) | 98%<br>(1380/1410) | 98%<br>(1381/1410) | 98%<br>(1383/1410) |
| ATCC 10031       |      | –                  | 100%<br>(1386/1386) | 99%<br>(1384/1386)  | 99%<br>(1384/1386)  | 99%<br>(1383/1386) | 99%<br>(1383/1386) | 99%<br>(1383/1386)  | 99%<br>(1384/1386)  | 98%<br>(1354/1386) | 98%<br>(1355/1386) | 98%<br>(1357/1386) |
| CG43             |      |                    | –                   | 99%<br>(1408/1410)  | 99%<br>(1384/1386)  | 99%<br>(1383/1386) | 99%<br>(1383/1386) | 99%<br>(1383/1386)  | 99%<br>(1384/1386)  | 98%<br>(1378/1410) | 98%<br>(1379/1410) | 98%<br>(1381/1410) |
| HS11286          |      |                    |                     | –                   | 100%<br>(1386/1386) | 99%<br>(1385/1386) | 99%<br>(1385/1386) | 99%<br>(1385/1386)  | 100%<br>(1386/1386) | 98%<br>(1380/1410) | 98%<br>(1381/1410) | 98%<br>(1383/1410) |
| JM45             |      |                    |                     |                     | –                   | 99%<br>(1385/1386) | 99%<br>(1385/1386) | 99%<br>(1385/1386)  | 100%<br>(1386/1386) | 98%<br>(1356/1386) | 98%<br>(1357/1386) | 98%<br>(1359/1386) |
| KCTC 2242        |      |                    |                     |                     |                     | –                  | 99%<br>(1384/1386) | 99%<br>(1384/1386)  | 99%<br>(1385/1386)  | 98%<br>(1355/1386) | 98%<br>(1356/1386) | 98%<br>(1358/1386) |
| Kp13             |      |                    |                     |                     |                     |                    | –                  | 100%<br>(1386/1386) | 99%<br>(1385/1386)  | 98%<br>(1355/1386) | 98%<br>(1356/1386) | 98%<br>(1358/1386) |
| MGH 78578        |      |                    |                     |                     |                     |                    |                    | –                   | 99%<br>(1385/1386)  | 98%<br>(1355/1386) | 98%<br>(1356/1386) | 98%<br>(1358/1386) |
| NTUH-K2044       |      |                    |                     |                     |                     |                    |                    |                     | –                   | 98%<br>(1356/1386) | 98%<br>(1357/1386) | 98%<br>(1359/1386) |
| ATCC 700603      |      |                    |                     |                     |                     |                    |                    |                     |                     | –                  | 99%<br>(1407/1410) | 99%<br>(1395/1410) |
| HKUOPA4          |      |                    |                     |                     |                     |                    |                    |                     |                     |                    | –                  | 99%<br>(1396/1410) |
| 342              |      |                    |                     |                     |                     |                    |                    |                     |                     |                    |                    | –                  |

**Table S5.** Percentage sequence identity of *gyrA* gene among strains of *K. pneumoniae* from phylogroups KpI, KpII and KpIII.

| <i>gyrA</i> gene | KpI  |                    |                     |                    |                     |                    |                    |                    |                    | KpII               |                    | KpIII              |
|------------------|------|--------------------|---------------------|--------------------|---------------------|--------------------|--------------------|--------------------|--------------------|--------------------|--------------------|--------------------|
| Strain           | 1084 | ATCC 10031         | CG43                | HS11286            | JM45                | KCTC 2242          | Kp13               | MGH 78578          | NTUH-K2044         | ATCC 700603        | HKUOPA4            | 342                |
| 1084             | –    | 99%<br>(2611/2626) | 99%<br>(2619/2634)  | 99%<br>(2618/2634) | 99%<br>(2618/2634)  | 99%<br>(2609/2626) | 99%<br>(2617/2634) | 99%<br>(2616/2634) | 99%<br>(2633/2634) | 97%<br>(2555/2634) | 97%<br>(2551/2634) | 97%<br>(2568/2634) |
| ATCC 10031       |      | –                  | 100%<br>(2626/2626) | 99%<br>(2611/2626) | 99%<br>(2611/2626)  | 99%<br>(2624/2626) | 99%<br>(2608/2626) | 99%<br>(2613/2626) | 99%<br>(2612/2626) | 97%<br>(2544/2626) | 97%<br>(2541/2626) | 97%<br>(2560/2626) |
| CG43             |      |                    | –                   | 99%<br>(2619/2634) | 99%<br>(2619/2634)  | 99%<br>(2624/2626) | 99%<br>(2616/2634) | 99%<br>(2621/2634) | 99%<br>(2620/2634) | 97%<br>(2551/2634) | 97%<br>(2548/2634) | 97%<br>(2567/2634) |
| HS11286          |      |                    |                     | –                  | 100%<br>(2634/2634) | 99%<br>(2611/2626) | 99%<br>(2629/2634) | 99%<br>(2619/2634) | 99%<br>(2619/2634) | 97%<br>(2550/2634) | 97%<br>(2547/2634) | 98%<br>(2570/2634) |
| JM45             |      |                    |                     |                    | –                   | 99%<br>(2611/2626) | 99%<br>(2629/2634) | 99%<br>(2619/2634) | 99%<br>(2619/2634) | 97%<br>(2550/2634) | 97%<br>(2547/2634) | 98%<br>(2570/2634) |
| KCTC 2242        |      |                    |                     |                    |                     | –                  | 99%<br>(2609/2626) | 99%<br>(2613/2626) | 99%<br>(2610/2626) | 97%<br>(2542/2626) | 97%<br>(2539/2626) | 97%<br>(2558/2626) |
| Kp13             |      |                    |                     |                    |                     |                    | –                  | 99%<br>(2618/2634) | 99%<br>(2618/2634) | 97%<br>(2547/2634) | 97%<br>(2544/2634) | 97%<br>(2567/2634) |
| MGH 78578        |      |                    |                     |                    |                     |                    |                    | –                  | 99%<br>(2617/2634) | 97%<br>(2549/2634) | 97%<br>(2545/2634) | 97%<br>(2566/2634) |
| NTUH-K2044       |      |                    |                     |                    |                     |                    |                    |                    | –                  | 97%<br>(2556/2634) | 97%<br>(2552/2634) | 98%<br>(2569/2634) |
| ATCC 700603      |      |                    |                     |                    |                     |                    |                    |                    |                    | –                  | 99%<br>(2627/2634) | 96%<br>(2541/2634) |
| HKUOPA4          |      |                    |                     |                    |                     |                    |                    |                    |                    |                    | –                  | 96%<br>(2537/2634) |
| 342              |      |                    |                     |                    |                     |                    |                    |                    |                    |                    |                    | –                  |

**Table S6.** Percentage sequence identity of *proC* gene among strains of *K. pneumoniae* from phylogroups KpI, KpII and KpIII.

| <i>proC</i> gene | KpI  |                  |                   |                   |                   |                  |                  |                   |                   | KpII             |                  | KpIII            |
|------------------|------|------------------|-------------------|-------------------|-------------------|------------------|------------------|-------------------|-------------------|------------------|------------------|------------------|
| Strain           | 1084 | ATCC 10031       | CG43              | HS11286           | JM45              | KCTC 2242        | Kp13             | MGH 78578         | NTUH-K2044        | ATCC 700603      | HKUOPA4          | 342              |
| 1084             | –    | 99%<br>(808/810) | 99%<br>(808/810)  | 99%<br>(808/810)  | 99%<br>(808/810)  | 99%<br>(806/810) | 99%<br>(807/810) | 99%<br>(808/810)  | 100%<br>(810/810) | 93%<br>(756/810) | 93%<br>(757/810) | 94%<br>(762/810) |
| ATCC 10031       |      | –                | 100%<br>(810/810) | 100%<br>(810/810) | 100%<br>(816/816) | 99%<br>(810/816) | 99%<br>(813/816) | 100%<br>(816/816) | 99%<br>(808/810)  | 94%<br>(758/810) | 94%<br>(759/810) | 94%<br>(764/810) |
| CG43             |      |                  | –                 | 100%<br>(810/810) | 100%<br>(810/810) | 99%<br>(804/810) | 99%<br>(807/810) | 100%<br>(810/810) | 99%<br>(808/810)  | 94%<br>(758/810) | 94%<br>(759/810) | 94%<br>(764/810) |
| HS11286          |      |                  |                   | –                 | 100%<br>(810/810) | 99%<br>(804/810) | 99%<br>(807/810) | 100%<br>(810/810) | 99%<br>(808/810)  | 94%<br>(758/810) | 94%<br>(759/810) | 94%<br>(764/810) |
| JM45             |      |                  |                   |                   | –                 | 99%<br>(810/816) | 99%<br>(813/816) | 100%<br>(816/816) | 99%<br>(808/810)  | 94%<br>(758/810) | 94%<br>(759/810) | 94%<br>(764/810) |
| KCTC 2242        |      |                  |                   |                   |                   | –                | 99%<br>(813/816) | 99%<br>(810/816)  | 99%<br>(806/810)  | 93%<br>(754/810) | 93%<br>(755/810) | 94%<br>(760/810) |
| Kp13             |      |                  |                   |                   |                   |                  | –                | 99%<br>(813/816)  | 99%<br>(807/810)  | 93%<br>(757/810) | 94%<br>(758/810) | 94%<br>(763/810) |
| MGH 78578        |      |                  |                   |                   |                   |                  |                  | –                 | 99%<br>(808/810)  | 94%<br>(758/810) | 94%<br>(759/810) | 94%<br>(764/810) |
| NTUH-K2044       |      |                  |                   |                   |                   |                  |                  |                   | –                 | 93%<br>(756/810) | 93%<br>(757/810) | 94%<br>(762/810) |
| ATCC 700603      |      |                  |                   |                   |                   |                  |                  |                   |                   | –                | 99%<br>(801/810) | 94%<br>(765/810) |
| HKUOPA4          |      |                  |                   |                   |                   |                  |                  |                   |                   |                  | –                | 94%<br>(762/810) |
| 342              |      |                  |                   |                   |                   |                  |                  |                   |                   |                  |                  | –                |

**Table S7.** Percentage sequence identity of *recA* gene among strains of *K. pneumoniae* from phylogroups KpI, KpII and KpIII.

| <i>recA</i> gene | KpI  |                    |                     |                    |                     |                    |                    |                    |                     | KpII               |                     | KpIII              |
|------------------|------|--------------------|---------------------|--------------------|---------------------|--------------------|--------------------|--------------------|---------------------|--------------------|---------------------|--------------------|
| Strain           | 1084 | ATCC 10031         | CG43                | HS11286            | JM45                | KCTC 2242          | Kp13               | MGH 78578          | NTUH-K2044          | ATCC 700603        | HKUOPA4             | 342                |
| 1084             | –    | 99%<br>(1054/1059) | 99%<br>(1054/1059)  | 99%<br>(1054/1059) | 99%<br>(1041/1050)  | 99%<br>(1052/1059) | 99%<br>(1051/1059) | 99%<br>(1053/1059) | 100%<br>(1059/1059) | 95%<br>(1003/1059) | 95%<br>(1003/1059)  | 95%<br>(1001/1059) |
| ATCC 10031       |      | –                  | 100%<br>(1059/1059) | 99%<br>(1053/1059) | 99%<br>(1044/1050)  | 99%<br>(1057/1059) | 99%<br>(1054/1059) | 99%<br>(1054/1059) | 99%<br>(1054/1059)  | 95%<br>(1006/1059) | 95%<br>(1006/1059)  | 95%<br>(1002/1059) |
| CG43             |      |                    | –                   | 99%<br>(1053/1059) | 99%<br>(1044/1050)  | 99%<br>(1057/1059) | 99%<br>(1054/1059) | 99%<br>(1054/1059) | 99%<br>(1054/1059)  | 95%<br>(1006/1059) | 95%<br>(1006/1059)  | 95%<br>(1002/1059) |
| HS11286          |      |                    |                     | –                  | 100%<br>(1050/1050) | 99%<br>(1055/1059) | 99%<br>(1054/1059) | 99%<br>(1054/1059) | 99%<br>(1050/1059)  | 95%<br>(1010/1059) | 95%<br>(1010/1059)  | 95%<br>(1002/1059) |
| JM45             |      |                    |                     |                    | –                   | 99%<br>(1046/1050) | 99%<br>(1045/1050) | 99%<br>(1046/1050) | 99%<br>(1041/1050)  | 95%<br>(1001/1049) | 95%<br>(1001/1049)  | 95%<br>(993/1049)  |
| KCTC 2242        |      |                    |                     |                    |                     | –                  | 99%<br>(1054/1059) | 99%<br>(1052/1059) | 99%<br>(1052/1059)  | 95%<br>(1008/1059) | 95%<br>(1008/1059)  | 94%<br>(1004/1059) |
| Kp13             |      |                    |                     |                    |                     |                    | –                  | 99%<br>(1053/1059) | 99%<br>(1051/1059)  | 95%<br>(1009/1059) | 95%<br>(1009/1059)  | 95%<br>(1003/1059) |
| MGH 78578        |      |                    |                     |                    |                     |                    |                    | –                  | 99%<br>(1053/1059)  | 95%<br>(1005/1059) | 95%<br>(1005/1059)  | 95%<br>(1005/1059) |
| NTUH-K2044       |      |                    |                     |                    |                     |                    |                    |                    | –                   | 95%<br>(1003/1059) | 95%<br>(1003/1059)  | 95%<br>(1001/1059) |
| ATCC 700603      |      |                    |                     |                    |                     |                    |                    |                    |                     | –                  | 100%<br>(1059/1059) | 97%<br>(1032/1059) |
| HKUOPA4          |      |                    |                     |                    |                     |                    |                    |                    |                     |                    | –                   | 97%<br>(1032/1059) |
| 342              |      |                    |                     |                    |                     |                    |                    |                    |                     |                    |                     | –                  |

**Table S8.** Percentage sequence identity of *rho* gene among strains of *K. pneumoniae* from phylogroups KpI, KpII and KpIII.

| <i>rho</i> gene | KpI  |                    |                     |                    |                     |                     |                    |                    | KpII                |                    | KpIII              |                    |
|-----------------|------|--------------------|---------------------|--------------------|---------------------|---------------------|--------------------|--------------------|---------------------|--------------------|--------------------|--------------------|
| Strain          | 1084 | ATCC 10031         | CG43                | HS11286            | JM45                | KCTC 2242           | Kp13               | MGH 78578          | NTUH-K2044          | ATCC 700603        | HKUOPA4            | 342                |
| 1084            | –    | 99%<br>(1257/1260) | 99%<br>(1257/1260)  | 99%<br>(1257/1260) | 99%<br>(1257/1260)  | 99%<br>(1257/1260)  | 99%<br>(1256/1260) | 99%<br>(1255/1260) | 100%<br>(1260/1260) | 97%<br>(1218/1260) | 97%<br>(1218/1260) | 97%<br>(1217/1260) |
| ATCC 10031      |      | –                  | 100%<br>(1260/1260) | 99%<br>(1258/1260) | 99%<br>(1258/1260)  | 100%<br>(1260/1260) | 99%<br>(1259/1260) | 99%<br>(1258/1260) | 99%<br>(1257/1260)  | 97%<br>(1219/1260) | 97%<br>(1219/1260) | 97%<br>(1218/1260) |
| CG43            |      |                    | –                   | 99%<br>(1258/1260) | 99%<br>(1258/1260)  | 100%<br>(1260/1260) | 99%<br>(1259/1260) | 99%<br>(1258/1260) | 99%<br>(1257/1260)  | 97%<br>(1219/1260) | 97%<br>(1219/1260) | 97%<br>(1218/1260) |
| HS11286         |      |                    |                     | –                  | 100%<br>(1260/1260) | 99%<br>(1258/1260)  | 99%<br>(1257/1260) | 99%<br>(1256/1260) | 99%<br>(1257/1260)  | 97%<br>(1217/1260) | 97%<br>(1217/1260) | 97%<br>(1216/1260) |
| JM45            |      |                    |                     |                    | –                   | 99%<br>(1258/1260)  | 99%<br>(1257/1260) | 99%<br>(1256/1260) | 99%<br>(1257/1260)  | 97%<br>(1217/1260) | 97%<br>(1217/1260) | 97%<br>(1216/1260) |
| KCTC 2242       |      |                    |                     |                    |                     | –                   | 99%<br>(1259/1260) | 99%<br>(1258/1260) | 99%<br>(1257/1260)  | 97%<br>(1219/1260) | 97%<br>(1219/1260) | 97%<br>(1218/1260) |
| Kp13            |      |                    |                     |                    |                     |                     | –                  | 99%<br>(1257/1260) | 99%<br>(1256/1260)  | 97%<br>(1218/1260) | 97%<br>(1218/1260) | 97%<br>(1217/1260) |
| MGH 78578       |      |                    |                     |                    |                     |                     |                    | –                  | 99%<br>(1256/1260)  | 97%<br>(1217/1260) | 97%<br>(1217/1260) | 97%<br>(1216/1260) |
| NTUH-K2044      |      |                    |                     |                    |                     |                     |                    |                    | –                   | 97%<br>(1218/1260) | 97%<br>(1218/1260) | 97%<br>(1217/1260) |
| ATCC 700603     |      |                    |                     |                    |                     |                     |                    |                    |                     | –                  | 99%<br>(1258/1260) | 96%<br>(1213/1260) |
| HKUOPA4         |      |                    |                     |                    |                     |                     |                    |                    |                     |                    | –                  | 96%<br>(1213/1260) |
| 342             |      |                    |                     |                    |                     |                     |                    |                    |                     |                    |                    | –                  |

**Table S9.** Percentage sequence identity of *rpoC* gene among strains of *K. pneumoniae* from phylogroups KpI, KpII and KpIII.

| <i>rpoC</i> gene | KpI  |                    |                     |                    |                     |                    |                    |                    |                    | KpII               |                    | KpIII              |
|------------------|------|--------------------|---------------------|--------------------|---------------------|--------------------|--------------------|--------------------|--------------------|--------------------|--------------------|--------------------|
| Strain           | 1084 | ATCC 10031         | CG43                | HS11286            | JM45                | KCTC 2242          | Kp13               | MGH 78578          | NTUH-K2044         | ATCC 700603        | HKUOPA4            | 342                |
| 1084             | –    | 99%<br>(4218/4224) | 99%<br>(4218/4224)  | 99%<br>(4214/4224) | 99%<br>(4214/4224)  | 99%<br>(4213/4224) | 99%<br>(4217/4224) | 99%<br>(4219/4224) | 99%<br>(4223/4224) | 98%<br>(4155/4224) | 98%<br>(4156/4224) | 96%<br>(4054/4224) |
| ATCC 10031       |      | –                  | 100%<br>(4224/4224) | 99%<br>(4218/4224) | 99%<br>(4218/4224)  | 99%<br>(4217/4224) | 99%<br>(4221/4224) | 99%<br>(4221/4224) | 99%<br>(4219/4224) | 98%<br>(4159/4224) | 98%<br>(4160/4224) | 96%<br>(4060/4224) |
| CG43             |      |                    | –                   | 99%<br>(4218/4224) | 99%<br>(4218/4224)  | 99%<br>(4217/4224) | 99%<br>(4221/4224) | 99%<br>(4221/4224) | 99%<br>(4219/4224) | 98%<br>(4159/4224) | 98%<br>(4160/4224) | 96%<br>(4060/4224) |
| HS11286          |      |                    |                     | –                  | 100%<br>(4224/4224) | 99%<br>(4215/4224) | 99%<br>(4219/4224) | 99%<br>(4215/4224) | 99%<br>(4215/4224) | 98%<br>(4157/4224) | 98%<br>(4158/4224) | 96%<br>(4056/4224) |
| JM45             |      |                    |                     |                    | –                   | 99%<br>(4215/4224) | 99%<br>(4219/4224) | 99%<br>(4215/4224) | 99%<br>(4215/4224) | 98%<br>(4157/4224) | 98%<br>(4158/4224) | 96%<br>(4056/4224) |
| KCTC 2242        |      |                    |                     |                    |                     | –                  | 99%<br>(4214/4224) | 99%<br>(4216/4224) | 99%<br>(4214/4224) | 98%<br>(4154/4224) | 98%<br>(4155/4224) | 96%<br>(4054/4224) |
| Kp13             |      |                    |                     |                    |                     |                    | –                  | 99%<br>(4218/4224) | 99%<br>(4218/4224) | 98%<br>(4158/4224) | 98%<br>(4159/4224) | 96%<br>(4057/4224) |
| MGH 78578        |      |                    |                     |                    |                     |                    |                    | –                  | 99%<br>(4220/4224) | 98%<br>(4156/4224) | 98%<br>(4157/4224) | 96%<br>(4057/4224) |
| NTUH-K2044       |      |                    |                     |                    |                     |                    |                    |                    | –                  | 98%<br>(4156/4224) | 98%<br>(4157/4224) | 96%<br>(4055/4224) |
| ATCC 700603      |      |                    |                     |                    |                     |                    |                    |                    |                    | –                  | 99%<br>(4218/4224) | 96%<br>(4068/4224) |
| HKUOPA4          |      |                    |                     |                    |                     |                    |                    |                    |                    |                    | –                  | 96%<br>(4065/4224) |
| 342              |      |                    |                     |                    |                     |                    |                    |                    |                    |                    |                    | –                  |

**Table S10.** Percentage sequence identity of *rpoD* gene among strains of *K. pneumoniae* from phylogroups KpI, KpII and KpIII.

| <i>rpoD</i> gene | KpI  |                    |                     |                    |                     |                    |                    |                    | KpII                |                    | KpIII              |                    |
|------------------|------|--------------------|---------------------|--------------------|---------------------|--------------------|--------------------|--------------------|---------------------|--------------------|--------------------|--------------------|
| Strain           | 1084 | ATCC 10031         | CG43                | HS11286            | JM45                | KCTC 2242          | Kp13               | MGH 78578          | NTUH-K2044          | ATCC 700603        | HKUOPA4            | 342                |
| 1084             | –    | 99%<br>(1839/1842) | 99%<br>(1839/1842)  | 99%<br>(1836/1842) | 99%<br>(1836/1842)  | 99%<br>(1836/1842) | 99%<br>(1836/1842) | 99%<br>(1840/1842) | 100%<br>(1842/1842) | 98%<br>(1802/1842) | 98%<br>(1799/1842) | 98%<br>(1796/1842) |
| ATCC 10031       |      | –                  | 100%<br>(1842/1842) | 99%<br>(1839/1842) | 99%<br>(1839/1842)  | 99%<br>(1837/1842) | 99%<br>(1839/1842) | 99%<br>(1841/1842) | 99%<br>(1839/1842)  | 98%<br>(1805/1842) | 98%<br>(1802/1842) | 98%<br>(1799/1842) |
| CG43             |      |                    | –                   | 99%<br>(1839/1842) | 99%<br>(1839/1842)  | 99%<br>(1837/1842) | 99%<br>(1839/1842) | 99%<br>(1841/1842) | 99%<br>(1839/1842)  | 98%<br>(1805/1842) | 98%<br>(1802/1842) | 98%<br>(1799/1842) |
| HS11286          |      |                    |                     | –                  | 100%<br>(1842/1842) | 99%<br>(1840/1842) | 99%<br>(1840/1842) | 99%<br>(1838/1842) | 99%<br>(1836/1842)  | 98%<br>(1804/1842) | 98%<br>(1803/1842) | 98%<br>(1800/1842) |
| JM45             |      |                    |                     |                    | –                   | 99%<br>(1840/1842) | 99%<br>(1840/1842) | 99%<br>(1838/1842) | 99%<br>(1836/1842)  | 98%<br>(1804/1842) | 98%<br>(1803/1842) | 98%<br>(1800/1842) |
| KCTC 2242        |      |                    |                     |                    |                     | –                  | 99%<br>(1838/1842) | 99%<br>(1838/1842) | 99%<br>(1836/1842)  | 98%<br>(1802/1842) | 98%<br>(1801/1842) | 98%<br>(1798/1842) |
| Kp13             |      |                    |                     |                    |                     |                    | –                  | 99%<br>(1838/1842) | 99%<br>(1836/1842)  | 98%<br>(1804/1842) | 98%<br>(1803/1842) | 98%<br>(1800/1842) |
| MGH 78578        |      |                    |                     |                    |                     |                    |                    | –                  | 99%<br>(1840/1842)  | 98%<br>(1804/1842) | 98%<br>(1801/1842) | 98%<br>(1798/1842) |
| NTUH-K2044       |      |                    |                     |                    |                     |                    |                    |                    | –                   | 98%<br>(1802/1842) | 98%<br>(1799/1842) | 98%<br>(1796/1842) |
| ATCC 700603      |      |                    |                     |                    |                     |                    |                    |                    |                     | –                  | 99%<br>(1835/1842) | 98%<br>(1806/1842) |
| HKUOPA4          |      |                    |                     |                    |                     |                    |                    |                    |                     |                    | –                  | 98%<br>(1809/1842) |
| 342              |      |                    |                     |                    |                     |                    |                    |                    |                     |                    |                    | –                  |

**Table S11.** Percentage sequence identity of *rrsH* gene among strains of *K. pneumoniae* from phylogroups KpI, KpII and KpIII.

| <i>rrsH</i> gene | KpI  |                    |                    |                    |                    |                    |                    |                    |                    | KpII               |                    | KpIII              |
|------------------|------|--------------------|--------------------|--------------------|--------------------|--------------------|--------------------|--------------------|--------------------|--------------------|--------------------|--------------------|
| Strain           | 1084 | ATCC 10031         | CG43               | HS11286            | JM45               | KCTC 2242          | Kp13               | MGH 78578          | NTUH-K2044         | ATCC 700603        | HKUOPA4            | 342                |
| 1084             | –    | 99%<br>(1538/1544) | 99%<br>(1542/1544) | 99%<br>(1541/1544) | 99%<br>(1538/1544) | 99%<br>(1542/1544) | 99%<br>(1537/1544) | 99%<br>(1538/1544) | 99%<br>(1541/1544) | 99%<br>(1535/1544) | 99%<br>(1536/1544) | 99%<br>(1530/1544) |
| ATCC 10031       |      | –                  | 99%<br>(1539/1544) | 99%<br>(1538/1544) | 99%<br>(1533/1544) | 99%<br>(1539/1544) | 99%<br>(1534/1544) | 99%<br>(1535/1544) | 99%<br>(1538/1544) | 99%<br>(1534/1544) | 99%<br>(1535/1544) | 99%<br>(1536/1544) |
| CG43             |      |                    | –                  | 99%<br>(1540/1544) | 99%<br>(1538/1544) | 99%<br>(1541/1544) | 99%<br>(1539/1544) | 99%<br>(1540/1544) | 99%<br>(1543/1544) | 99%<br>(1546/1554) | 99%<br>(1547/1554) | 99%<br>(1541/1544) |
| HS11286          |      |                    |                    | –                  | 99%<br>(1538/1544) | 99%<br>(1542/1544) | 99%<br>(1535/1544) | 99%<br>(1536/1544) | 99%<br>(1541/1544) | 99%<br>(1535/1544) | 99%<br>(1538/1544) | 99%<br>(1532/1544) |
| JM45             |      |                    |                    |                    | –                  | 99%<br>(1537/1544) | 99%<br>(1541/1544) | 99%<br>(1542/1544) | 99%<br>(1539/1544) | 99%<br>(1538/1544) | 99%<br>(1535/1544) | 99%<br>(1535/1544) |
| KCTC 2242        |      |                    |                    |                    |                    | –                  | 99%<br>(1536/1544) | 99%<br>(1537/1544) | 99%<br>(1540/1544) | 99%<br>(1537/1544) | 99%<br>(1538/1544) | 99%<br>(1531/1544) |
| Kp13             |      |                    |                    |                    |                    |                    | –                  | 99%<br>(1543/1544) | 99%<br>(1538/1544) | 99%<br>(1539/1544) | 99%<br>(1534/1544) | 99%<br>(1534/1544) |
| MGH 78578        |      |                    |                    |                    |                    |                    |                    | –                  | 99%<br>(1539/1544) | 99%<br>(1540/1544) | 99%<br>(1535/1544) | 99%<br>(1535/1544) |
| NTUH-K2044       |      |                    |                    |                    |                    |                    |                    |                    | –                  | 99%<br>(1535/1544) | 99%<br>(1538/1544) | 99%<br>(1532/1544) |
| ATCC 700603      |      |                    |                    |                    |                    |                    |                    |                    |                    | –                  | 99%<br>(1549/1554) | 99%<br>(1544/1544) |
| HKUOPA4          |      |                    |                    |                    |                    |                    |                    |                    |                    |                    | –                  | 99%<br>(1541/1544) |
| 342              |      |                    |                    |                    |                    |                    |                    |                    |                    |                    |                    | –                  |



**Table S12.** Percentage sequence identity of *trpS* gene among strains of *K. pneumoniae* from phylogroups KpI, KpII and KpIII.

| <i>trpS</i> gene | KpI  |                   |                     |                   |                     |                    |                    |                   |                     | KpII              |                    | KpIII             |
|------------------|------|-------------------|---------------------|-------------------|---------------------|--------------------|--------------------|-------------------|---------------------|-------------------|--------------------|-------------------|
| Strain           | 1084 | ATCC 10031        | CG43                | HS11286           | JM45                | KCTC 2242          | Kp13               | MGH 78578         | NTUH-K2044          | ATCC 700603       | HKUOPA4            | 342               |
| 1084             | –    | 99%<br>(994/1008) | 99%<br>(994/1008)   | 99%<br>(994/1008) | 99%<br>(994/1008)   | 99%<br>(1000/1008) | 99%<br>(993/1008)  | 98%<br>(987/1008) | 100%<br>(1008/1008) | 94%<br>(947/1008) | 94%<br>(945/1008)  | 95%<br>(959/1008) |
| ATCC 10031       |      | –                 | 100%<br>(1008/1008) | 99%<br>(996/1008) | 99%<br>(996/1008)   | 99%<br>(1002/1008) | 99%<br>(995/1008)  | 98%<br>(989/1008) | 99%<br>(994/1008)   | 94%<br>(947/1008) | 94%<br>(945/1008)  | 94%<br>(949/1008) |
| CG43             |      |                   | –                   | 99%<br>(996/1008) | 99%<br>(996/1008)   | 99%<br>(1002/1008) | 99%<br>(995/1008)  | 98%<br>(989/1008) | 99%<br>(994/1008)   | 94%<br>(947/1008) | 94%<br>(945/1008)  | 94%<br>(949/1008) |
| HS11286          |      |                   |                     | –                 | 100%<br>(1008/1008) | 99%<br>(1002/1008) | 99%<br>(999/1008)  | 98%<br>(989/1008) | 99%<br>(994/1008)   | 94%<br>(943/1008) | 93%<br>(941/1008)  | 94%<br>(951/1008) |
| JM45             |      |                   |                     |                   | –                   | 99%<br>(1002/1008) | 99%<br>(999/1008)  | 98%<br>(989/1008) | 99%<br>(994/1008)   | 94%<br>(943/1008) | 93%<br>(941/1008)  | 94%<br>(951/1008) |
| KCTC 2242        |      |                   |                     |                   |                     | –                  | 99%<br>(1001/1008) | 99%<br>(995/1008) | 99%<br>(1000/1008)  | 94%<br>(945/1008) | 94%<br>(943/1008)  | 95%<br>(953/1008) |
| Kp13             |      |                   |                     |                   |                     |                    | –                  | 98%<br>(988/1008) | 99%<br>(993/1008)   | 94%<br>(946/1008) | 94%<br>(944/1008)  | 95%<br>(956/1008) |
| MGH 78578        |      |                   |                     |                   |                     |                    |                    | –                 | 98%<br>(987/1008)   | 94%<br>(946/1008) | 94%<br>(944/1008)  | 95%<br>(954/1008) |
| NTUH-K2044       |      |                   |                     |                   |                     |                    |                    |                   | –                   | 94%<br>(947/1008) | 94%<br>(945/1008)  | 95%<br>(959/1008) |
| ATCC 700603      |      |                   |                     |                   |                     |                    |                    |                   |                     | –                 | 99%<br>(1002/1008) | 94%<br>(952/1008) |
| HKUOPA4          |      |                   |                     |                   |                     |                    |                    |                   |                     |                   | –                  | 94%<br>(950/1008) |
| 342              |      |                   |                     |                   |                     |                    |                    |                   |                     |                   |                    | –                 |

**TABLE S13.** Statistical analyses by BestKeeper.

| <b>Genes</b>  | <b>GM [C<sub>T</sub>]<sup>1</sup></b> | <b>SD [<math>\pm</math> C<sub>T</sub>]<sup>2</sup></b> | <b>CV [% C<sub>T</sub>]<sup>3</sup></b> |
|---------------|---------------------------------------|--------------------------------------------------------|-----------------------------------------|
| <i>aat</i> *  | 38.79                                 | 1.56                                                   | 4.03                                    |
| <i>ffh</i>    | 23.90                                 | 1.00                                                   | 4.49                                    |
| <i>glnA</i>   | 23.76                                 | 0.95                                                   | 4.01                                    |
| <i>gyrA</i>   | 24.45                                 | 0.84                                                   | 3.45                                    |
| <i>proC</i>   | 24.91                                 | 0.59                                                   | 2.37                                    |
| <i>recA</i>   | 22.40                                 | 0.47                                                   | 2.10                                    |
| <i>rho</i>    | 23.91                                 | 0.69                                                   | 2.90                                    |
| <i>rpoC</i>   | 23.26                                 | 0.83                                                   | 3.59                                    |
| <i>rpoD</i>   | 25.04                                 | 0.74                                                   | 2.97                                    |
| <i>rrsH</i>   | 10.58                                 | 0.43                                                   | 4.10                                    |
| <i>trpS</i> * | 29.09                                 | 1.50                                                   | 5.14                                    |

**1.** Geometric mean of the C<sub>T</sub> values; **2.** Standard deviation of the C<sub>T</sub>s; **3.** Coefficient of variation of the C<sub>T</sub>s; \* Genes excluded from the subsequent statistical analyses

**TABLE S14.** Comparison of the BestKeeper, NormFinder and geNorm results calculated by RefFinder with those calculated by their corresponding original softwares. The superscripted numbers in parentheses (boldface and underlined) indicate the ranking of the genes with the most stable expression according to each analysis.

| Gene        | BestKeeper                       |                                  | NormFinder                       |                                  | GeNorm                            |                                    |
|-------------|----------------------------------|----------------------------------|----------------------------------|----------------------------------|-----------------------------------|------------------------------------|
|             | Original software                | RefFinder analysis               | Original software                | RefFinder analysis               | Original software                 | RefFinder analysis                 |
| <i>recA</i> | 0.849 <sup><b><u>1</u></b></sup> | 0.849 <sup><b><u>1</u></b></sup> | 0.296 <sup><b><u>1</u></b></sup> | 0.306 <sup><b><u>1</u></b></sup> | 0.67 <sup><b><u>5</u></b></sup>   | 0.764 <sup><b><u>5</u></b></sup>   |
| <i>rho</i>  | 0.816 <sup><b><u>2</u></b></sup> | 0.816 <sup><b><u>2</u></b></sup> | 0.328 <sup><b><u>2</u></b></sup> | 0.493 <sup><b><u>2</u></b></sup> | 0.78 <sup><b><u>6</u></b></sup>   | 0.85 <sup><b><u>6</u></b></sup>    |
| <i>glnA</i> | 0.814 <sup><b><u>3</u></b></sup> | 0.814 <sup><b><u>3</u></b></sup> | 0.776 <sup><b><u>9</u></b></sup> | 0.902 <sup><b><u>7</u></b></sup> | 0.92 <sup><b><u>8</u></b></sup>   | 0.979 <sup><b><u>8</u></b></sup>   |
| <i>gyrA</i> | 0.739 <sup><b><u>4</u></b></sup> | 0.739 <sup><b><u>4</u></b></sup> | 0.535 <sup><b><u>5</u></b></sup> | 0.777 <sup><b><u>6</u></b></sup> | 0.86 <sup><b><u>7</u></b></sup>   | 0.921 <sup><b><u>7</u></b></sup>   |
| <i>ffh</i>  | 0.712 <sup><b><u>5</u></b></sup> | 0.712 <sup><b><u>5</u></b></sup> | 0.760 <sup><b><u>8</u></b></sup> | 1.092 <sup><b><u>9</u></b></sup> | 0.99 <sup><b><u>9</u></b></sup>   | 1.035 <sup><b><u>9</u></b></sup>   |
| <i>rpoD</i> | 0.687 <sup><b><u>6</u></b></sup> | 0.687 <sup><b><u>6</u></b></sup> | 0.674 <sup><b><u>7</u></b></sup> | 0.727 <sup><b><u>4</u></b></sup> | 0.49 <sup><b><u>3</u></b></sup>   | 0.592 <sup><b><u>1/2</u></b></sup> |
| <i>proC</i> | 0.66 <sup><b><u>7</u></b></sup>  | 0.66 <sup><b><u>7</u></b></sup>  | 0.423 <sup><b><u>3</u></b></sup> | 0.632 <sup><b><u>3</u></b></sup> | 0.44 <sup><b><u>1/2</u></b></sup> | 0.617 <sup><b><u>3</u></b></sup>   |
| <i>rpoC</i> | 0.541 <sup><b><u>8</u></b></sup> | 0.541 <sup><b><u>8</u></b></sup> | 0.614 <sup><b><u>6</u></b></sup> | 0.932 <sup><b><u>8</u></b></sup> | 0.44 <sup><b><u>1/2</u></b></sup> | 0.592 <sup><b><u>1/2</u></b></sup> |
| <i>rrsH</i> | 0.42 <sup><b><u>9</u></b></sup>  | 0.42 <sup><b><u>9</u></b></sup>  | 0.515 <sup><b><u>4</u></b></sup> | 0.765 <sup><b><u>5</u></b></sup> | 0.60 <sup><b><u>4</u></b></sup>   | 0.724 <sup><b><u>4</u></b></sup>   |

**TABLE S15.** Primer sequences of the proposed reference genes (and corresponding locus tag) for *Klebsiella pneumoniae subsp. pneumoniae* 1084, phylogroup KpI (RefSeq: NC\_018522.1).

| Gene        | Locus tag | Forward (F) and Reverse (R) primer sequences (5' > 3') | Amplicon size |
|-------------|-----------|--------------------------------------------------------|---------------|
| <i>proC</i> | A79E_3956 | F- GATTGCCGATATCGTCTTCG<br>R- GAGACCACCAGCGACTCTTT     | 99 bp         |
| <i>recA</i> | A79E_1066 | F- TTAAACAGGCCGAATTCCAG<br>R- CCGCTTTCTCAATCAGCTTC     | 99 bp         |
| <i>rho</i>  | A79E_4905 | F- AACTACGACAAGCCGGAAAA<br>R- ACCGTTACCACGCTCCATAC     | 99 bp         |
| <i>rpoD</i> | A79E_0644 | F- TCCGGTGCATATGATTGAGA<br>R- ATACGCTCAGCCAGCTCTTC     | 105 bp        |

**TABLE S16.** Primer sequences of the proposed reference genes (and corresponding locus tag) for *Klebsiella pneumoniae* ATCC 10031, phylogroup KpI (ERS747594).

| Gene        | Locus tag      | Forward (F) and Reverse (R) primer sequences (5' > 3') | Amplicon size |
|-------------|----------------|--------------------------------------------------------|---------------|
| <i>proC</i> | NCTC7427_03519 | F- GATTGCCGATATCGTCTTCG<br>R- GAGACCACCAGCGACTCTTT     | 99 bp         |
| <i>recA</i> | NCTC7427_04077 | F- TTAAACAGGCCGAATTCCAG<br>R- CCGCTTTCTCAATCAGCTTC     | 99 bp         |
| <i>rho</i>  | NCTC7427_04869 | F- AACTACGACAAGCCGGAAAA<br>R- ACCGTTACCACGCTCCATAC     | 99 bp         |
| <i>rpoD</i> | NCTC7427_04564 | F- TCCGGTGCATATGATTGAGA<br>R- ATACGCTCAGCCAGCTCTTC     | 105 bp        |

**TABLE S17.** Primer sequences of the proposed reference genes (and corresponding locus tag) for *Klebsiella pneumoniae* CG43, phylogroup KpI (RefSeq: NC\_022566.1).

| Gene        | Locus tag    | Forward (F) and Reverse (R) primer sequences (5' > 3') | Amplicon size |
|-------------|--------------|--------------------------------------------------------|---------------|
| <i>proC</i> | D364_RS01715 | F- GATTGCCGATATCGTCTTCG<br>R- GAGACCACCAGCGACTCTTT     | 99 bp         |
| <i>recA</i> | D364_RS15830 | F- TTAAACAGGCCGAATTCCAG<br>R- CCGCTTTCTCAATCAGCTTC     | 99 bp         |
| <i>rho</i>  | D364_RS22365 | F- AACTACGACAAGCCGGAAAA<br>R- ACCGTTACCACGCTCCATAC     | 99 bp         |
| <i>rpoD</i> | D364_RS18330 | F- TCCGGTGCATATGATTGAGA<br>R- ATACGCTCAGCCAGCTCTTC     | 105 bp        |

**TABLE S18.** Primer sequences of the proposed reference genes (and corresponding locus tag) for *Klebsiella pneumoniae subsp. pneumoniae* HS11286, phylogroup KpI (RefSeq: NC\_016845.1).

| Gene        | Locus tag  | Forward (F) and Reverse (R) primer sequences (5' > 3') | Amplicon size |
|-------------|------------|--------------------------------------------------------|---------------|
| <i>proC</i> | KPHS_10670 | F- GATTGCCGATATCGTCTTCG<br>R- GAGACCACCAGCGACTCTTT     | 99 bp         |
| <i>recA</i> | KPHS_41020 | F- TTAAACAGGCCGAATTCCAG<br>R- CCGCTTTCTCAATCAGCTTC     | 99 bp         |
| <i>rho</i>  | KPHS_01300 | F- AACTACGACAAGCCGGAAAA<br>R- ACCGTTACCACGCTCCATAC     | 99 bp         |
| <i>rpoD</i> | KPHS_46060 | F- TCCGGTGCATATGATTGAGA<br>R- ATACGCTCAGCCAGCTCTTC     | 105 bp        |

**TABLE S19.** Primer sequences of the proposed reference genes (and corresponding locus tag) for *Klebsiella pneumoniae* JM45, phylogroup KpI (RefSeq: NC\_022082.1).

| Gene        | Locus tag | Forward (F) and Reverse (R) primer sequences (5' > 3') | Amplicon size |
|-------------|-----------|--------------------------------------------------------|---------------|
| <i>proC</i> | N559_4083 | F- GATTGCCGATATCGTCTTCG<br>R- GAGACCACCAGCGACTCTTT     | 99 bp         |
| <i>recA</i> | N559_1206 | F- TTAAACAGGCCGAATTCCAG<br>R- CCGCTTTCTCAATCAGCTTC     | 99 bp         |
| <i>rho</i>  | N559_5002 | F- AACTACGACAAGCCGGAAAA<br>R- ACCGTTACCACGCTCCATAC     | 99 bp         |
| <i>rpoD</i> | N559_0700 | F- TCCGGTGCATATGATTGAGA<br>R- ATACGCTCAGCCAGCTCTTC     | 105 bp        |

**TABLE S20.** Primer sequences of the proposed reference genes (and corresponding locus tag) for *Klebsiella pneumoniae* KCTC 2242, phylogroup KpI (RefSeq: NC\_017540.1).

| Gene        | Locus tag       | Forward (F) and Reverse (R) primer sequences (5' > 3') | Amplicon size |
|-------------|-----------------|--------------------------------------------------------|---------------|
| <i>proC</i> | KPN2242_RS04295 | F- GATTGCCGATATCGTCTTCG<br>R- GAGACCACCAGCGACTCTTT     | 99 bp         |
| <i>recA</i> | KPN2242_RS18970 | F- TTAAACAGGCCGAATTCCAG<br>R- CCGCTTTCTCAATCAGCTTC     | 99 bp         |
| <i>rho</i>  | KPN2242_RS25525 | F- AACTACGACAAGCCGGAAAA<br>R- ACCGTTACCACGCTCCATAC     | 99 bp         |
| <i>rpoD</i> | KPN2242_RS21380 | F- TCCGGTGCATATGATTGAGA<br>R- ATACGCTCAGCCAGCTCTTC     | 105 bp        |

**TABLE S21.** Primer sequences of the proposed reference genes (and corresponding locus tag) for *Klebsiella pneumoniae subsp. pneumoniae* Kp13, phylogroup KpI (RefSeq: NZ\_003999.1).

| Gene        | Locus tag  | Forward (F) and Reverse (R) primer sequences (5' > 3') | Amplicon size |
|-------------|------------|--------------------------------------------------------|---------------|
| <i>proC</i> | KP13_02087 | F- GATTGCCGATATCGTCTTCG<br>R- GAGACCACCAGCGACTCTTT     | 99 bp         |
| <i>recA</i> | KP13_02602 | F- TTAAACAGGCCGAATTCCAG<br>R- CCGCTTTCTCAATCAGCTTC     | 99 bp         |
| <i>rho</i>  | KP13_32218 | F- AACTACGACAAGCCGGAAAA<br>R- ACCGTTACCACGCTCCATAC     | 99 bp         |
| <i>rpoD</i> | KP13_31791 | F- TCCGGTGCATATGATTGAGA<br>R- ATACGCTCAGCCAGCTCTTC     | 105 bp        |

**TABLE S22.** Primer sequences of the proposed reference genes (and corresponding locus tag) for *Klebsiella pneumoniae subsp. pneumoniae* NTUH-K2044, phylogroup KpI (RefSeq: NC\_012731.1).

| Gene        | Locus tag   | Forward (F) and Reverse (R) primer sequences (5' > 3') | Amplicon size |
|-------------|-------------|--------------------------------------------------------|---------------|
| <i>proC</i> | KP1_RS05650 | F- GATTGCCGATATCGTCTTCG<br>R- GAGACCACCAGCGACTCTTT     | 99 bp         |
| <i>recA</i> | KP1_RS20055 | F- TTAAACAGGCCGAATTCCAG<br>R- CCGCTTTCTCAATCAGCTTC     | 99 bp         |
| <i>rho</i>  | KP1_RS00705 | F- AACTACGACAAGCCGGAAAA<br>R- ACCGTTACCACGCTCCATAC     | 99 bp         |
| <i>rpoD</i> | KP1_RS22225 | F- TCCGGTGCATATGATTGAGA<br>R- ATACGCTCAGCCAGCTCTTC     | 105 bp        |

**TABLE S23.** Primer sequences of the proposed reference genes (and corresponding locus tag) for *Klebsiella pneumoniae subsp. pneumoniae* MGH 78578, phylogroup KpI (RefSeq: NC\_009648.1).

| Gene        | Locus tag   | Forward (F) and Reverse (R) primer sequences (5' > 3') | Amplicon size |
|-------------|-------------|--------------------------------------------------------|---------------|
| <i>proC</i> | KPN_RS01765 | F- GATTGCCGATATCGTCTTCG<br>R- GAGACCACCAGCGACTCTTT     | 99 bp         |
| <i>recA</i> | KPN_RS16255 | F- TTAAACAGGCCGAATTCCAG<br>R- CCGCTTTCTCAATCAGCTTC     | 99 bp         |
| <i>rho</i>  | KPN_RS23075 | F- AACTACGACAAGCCGGAAAA<br>R- ACCGTTACCACGCTCCATAC     | 99 bp         |
| <i>rpoD</i> | KPN_RS18620 | F- TCCGGTGCATATGATTGAGA<br>R- ATACGCTCAGCCAGCTCTTC     | 105 bp        |

**TABLE S24.** Primer sequences of the proposed reference genes (and corresponding locus tag) for *Klebsiella quasipneumoniae* strain HKUOPA4, phylogroup KpII (RefSeq: NZ\_CP014154.1). Nucleotides different from the primers of the KpI strains are in bold and underlined.

| Gene        | Locus tag     | Forward (F) and Reverse (R) primer sequences (5' > 3')               | Amplicon size |
|-------------|---------------|----------------------------------------------------------------------|---------------|
| <i>proC</i> | AWV58_RS00665 | F- <u>A</u> ATTGCCGATATCGTCTTCG<br>R- GAGACCACCAGCGACTCTTT           | 99 bp         |
| <i>recA</i> | AWV58_RS14870 | F- TCAAACAGGCT <u>T</u> GAATTCCAG<br>R- CCGCTTTCTCAATCAGCTTC         | 99 bp         |
| <i>rho</i>  | AWV58_RS21150 | F- AACTACGACAAGCCGGAAAA<br>R- ACCGTTACCACG <u>C</u> TCCATAC          | 99 bp         |
| <i>rpoD</i> | AWV58_RS17120 | F- TCCGGTGCATATGATTGAGA<br>R- AT <u>G</u> CGCTC <u>G</u> GCCAGCTCTTC | 105 bp        |

**TABLE S25.** Primer sequences of the proposed reference genes (and corresponding locus tag) for *Klebsiella quasipneumoniae* strain ATCC 700603, phylogroup KpII (RefSeq: NZ\_CP014696.2). Nucleotides different from the primers of the KpI strains are in bold and underlined.

| Gene        | Locus tag     | Forward (F) and Reverse (R) primer sequences (5' > 3')       | Amplicon size |
|-------------|---------------|--------------------------------------------------------------|---------------|
| <i>proC</i> | AVR78_RS25190 | F- <u>A</u> ATTGCCGATATCGTCTTCG<br>R- GAGACCACCAGCGACTCTTT   | 99 bp         |
| <i>recA</i> | AVR78_RS13765 | F- TCAAACAGGCT <u>T</u> GAATTCCAG<br>R- CCGCTTTCTCAATCAGCTTC | 99 bp         |
| <i>rho</i>  | AVR78_RS20240 | F- AACTACGACAAGCCGGAAAA<br>R- ACCGTTACCACG <u>C</u> TCCATAC  | 99 bp         |
| <i>rpoD</i> | AVR78_RS16040 | F- TCCGGTGCATATGATTGAGA<br>R- AT <u>G</u> CGCTCAGCCAGCTCTTC  | 105 bp        |

**TABLE S26.** Primer sequences of the proposed reference genes (and corresponding locus tag) for *Klebsiella varicella* (formerly identified as *K. pneumoniae* strain 342), phylogroup KpIII (RefSeq: NC\_011283.1). Nucleotides different from the primers of the KpI strains are in bold and underlined.

| Gene        | Locus tag   | Forward (F) and Reverse (R) primer sequences (5' > 3')       | Amplicon size |
|-------------|-------------|--------------------------------------------------------------|---------------|
| <i>proC</i> | KPK_RS20665 | F- GATTGCCGATATCGTCTTCG<br>R- GAGACCACCAGCGACTCTTT           | 99 bp         |
| <i>recA</i> | KPK_RS05310 | F- TCAAACAGGCT <u>T</u> GAATTCCAG<br>R- CCGCTTTCTCAATCAGCTTC | 99 bp         |
| <i>rho</i>  | KPK_RS25625 | F- AACTACGACAAGCCGGAAAA<br>R- ACCGTTACCACG <u>T</u> TCCATAC  | 99 bp         |
| <i>rpoD</i> | KPK_RS03130 | F- TCCGGTGCATATGATTGAGA<br>R- ATACGCTCAGCCAGCTCTTC           | 105 bp        |

**TABLE S27.** Primers used on the RT-qPCR analysis of the Fur-regulated genes *cirA*, *iroN* and *fiu* in *K. pneumoniae* strain ATCC 10031. The size of the amplicons are given in base pairs (bp). All primer pairs have the same annealing temperature (60° C).

| <b>Gene</b> | <b>Forward primer (5' &gt; 3')</b> | <b>Reverse primer (5' &gt; 3')</b> | <b>Size</b> |
|-------------|------------------------------------|------------------------------------|-------------|
| <i>cirA</i> | CGACGGCAAGTATGTCCTG                | GCTCAGGTTGACCGGATCT                | 100 bp      |
| <i>iroN</i> | ACCGGGATATTCGCCTGAA                | GGCCAGGCTCATTGTAGGT                | 96 bp       |
| <i>fiu</i>  | AGTATGCCGCACTCAACTCC               | GGGTACCGCTGTCGGTAGTA               | 96 bp       |
